# Supplementary material for: Sequence-based prediction of protein-protein interactions by means of codon usage
Source: Springer Nature journal article supplement (doi:10.1186/gb-2008-9-5-r87), 2008-05-23
Supplement: Additional file 1 [file gb-2008-9-5-r87-s1.pdf]

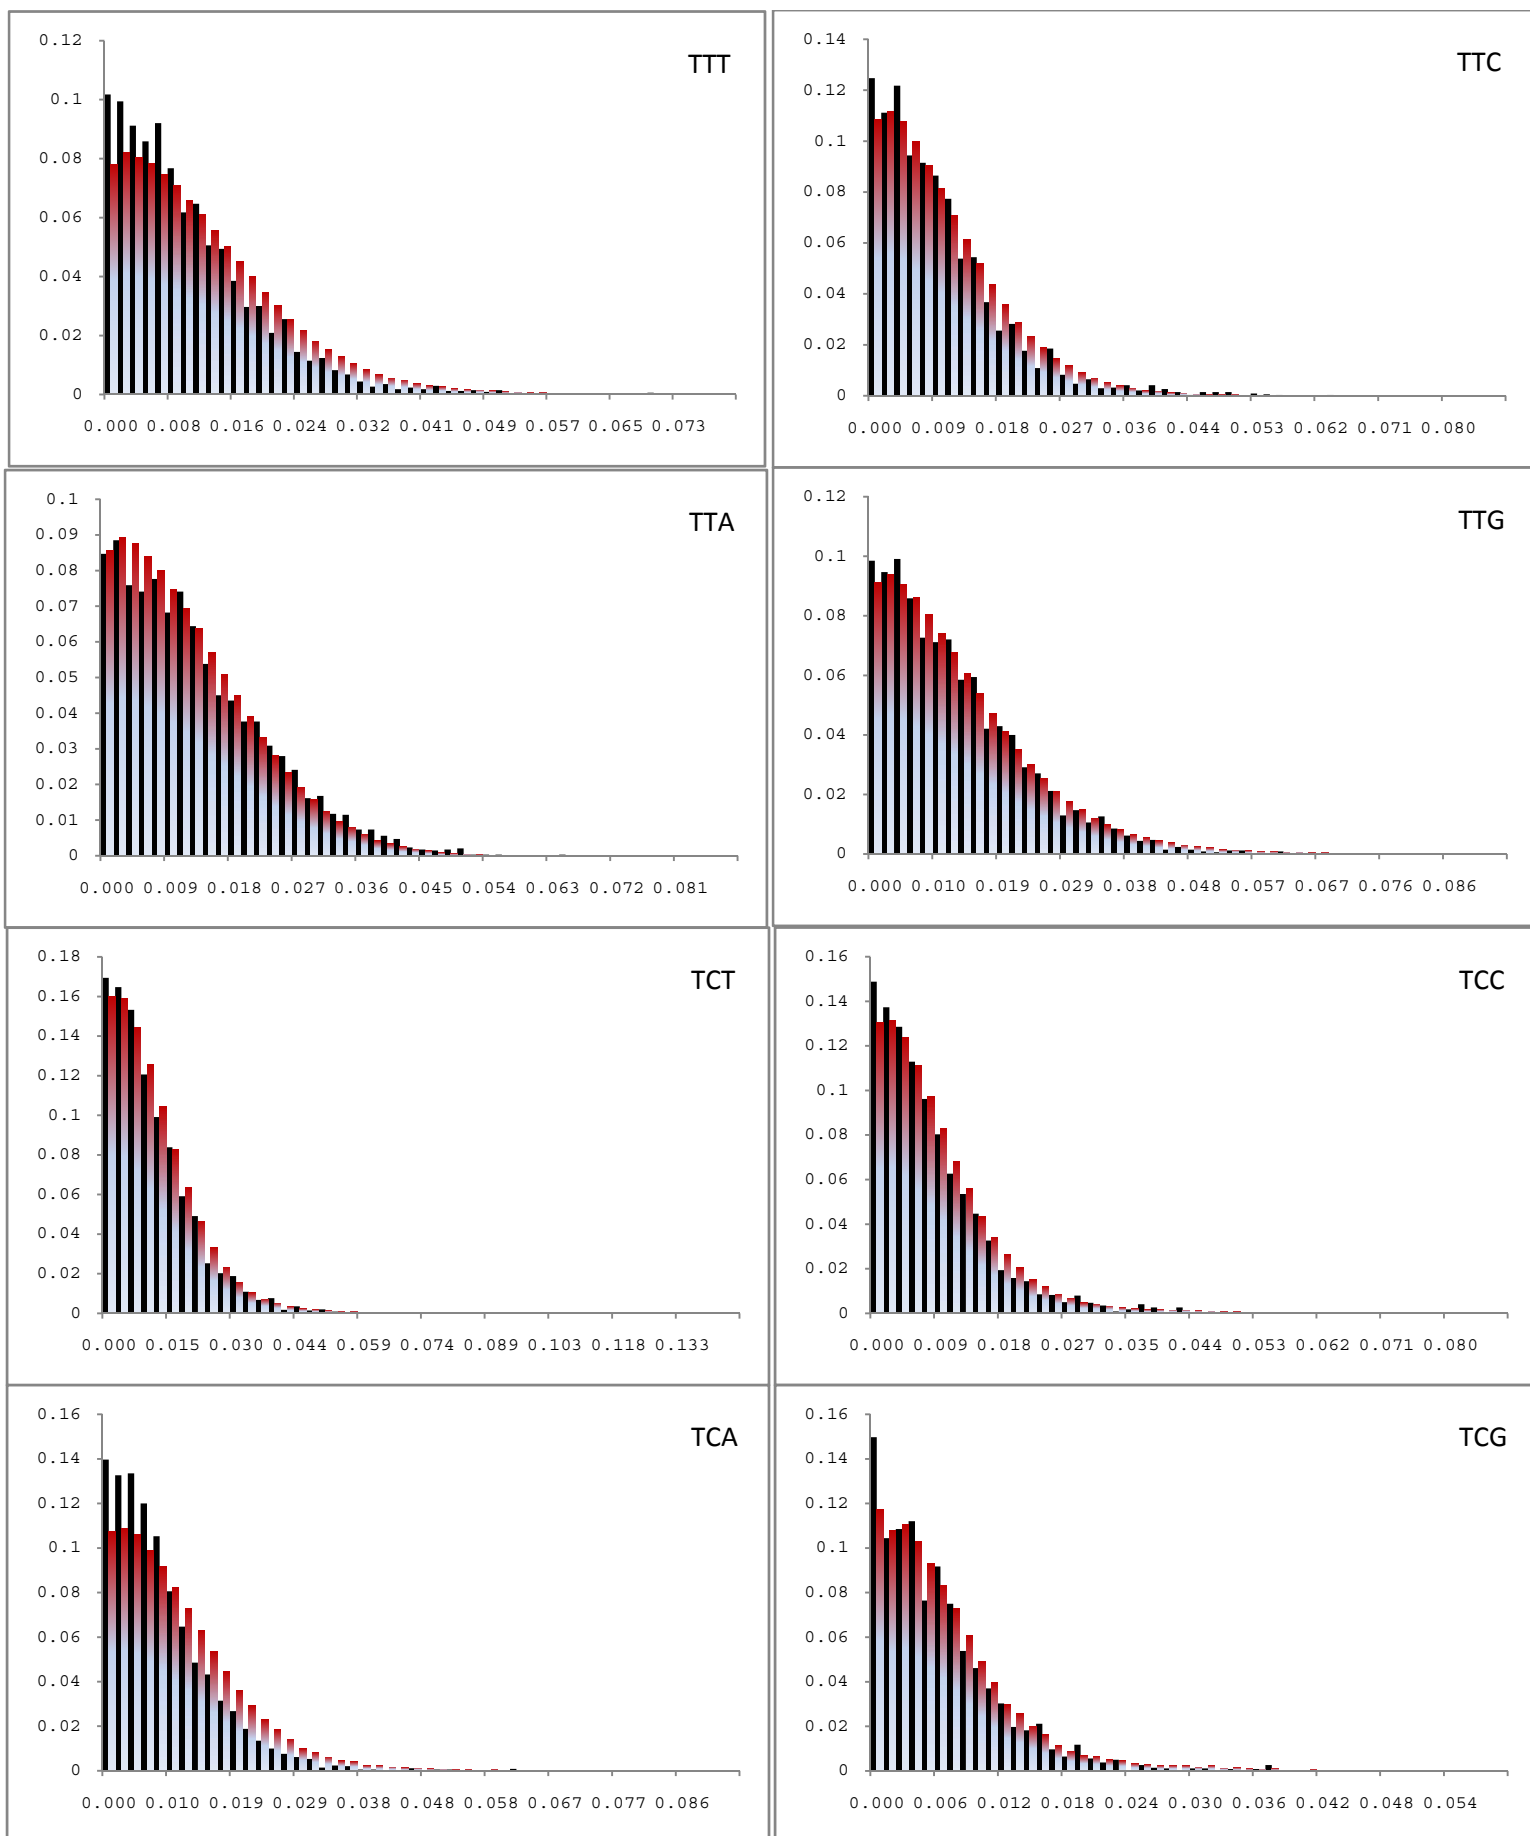

**Figure S1** Distribution of  $d$  for each codon in yeast. The value of  $d$  is demonstrated on the horizontal axis, whereas the vertical axis shows the density. Black bars represent distribution of  $d$  in positive gold standard set and red bars stand for the distribution of  $d$  in negative gold standard set.

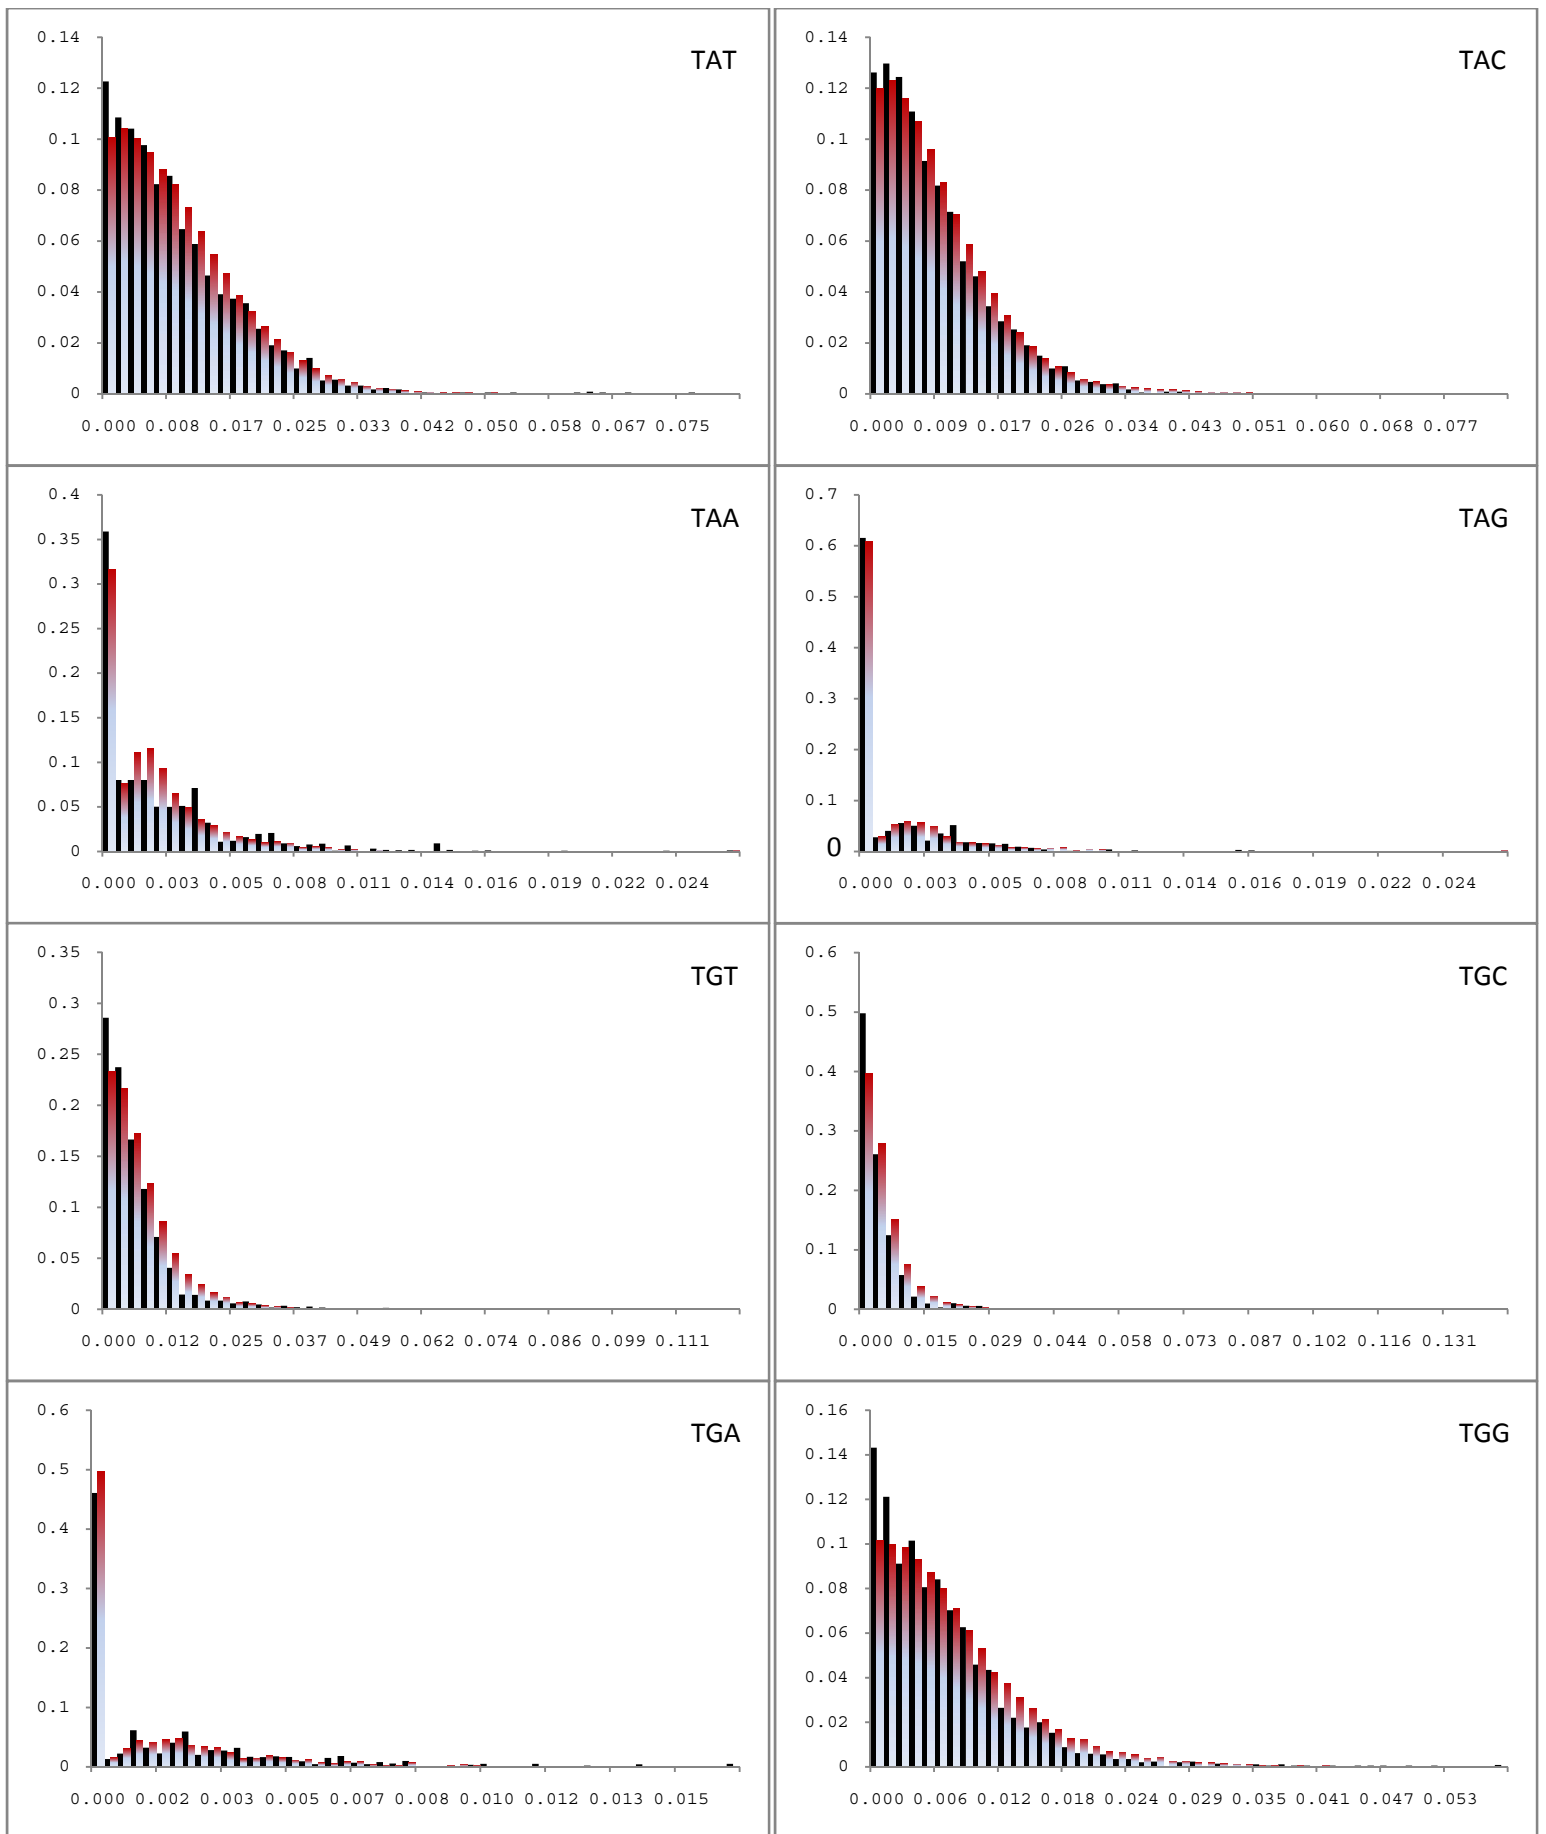

Figure S1 Continued.

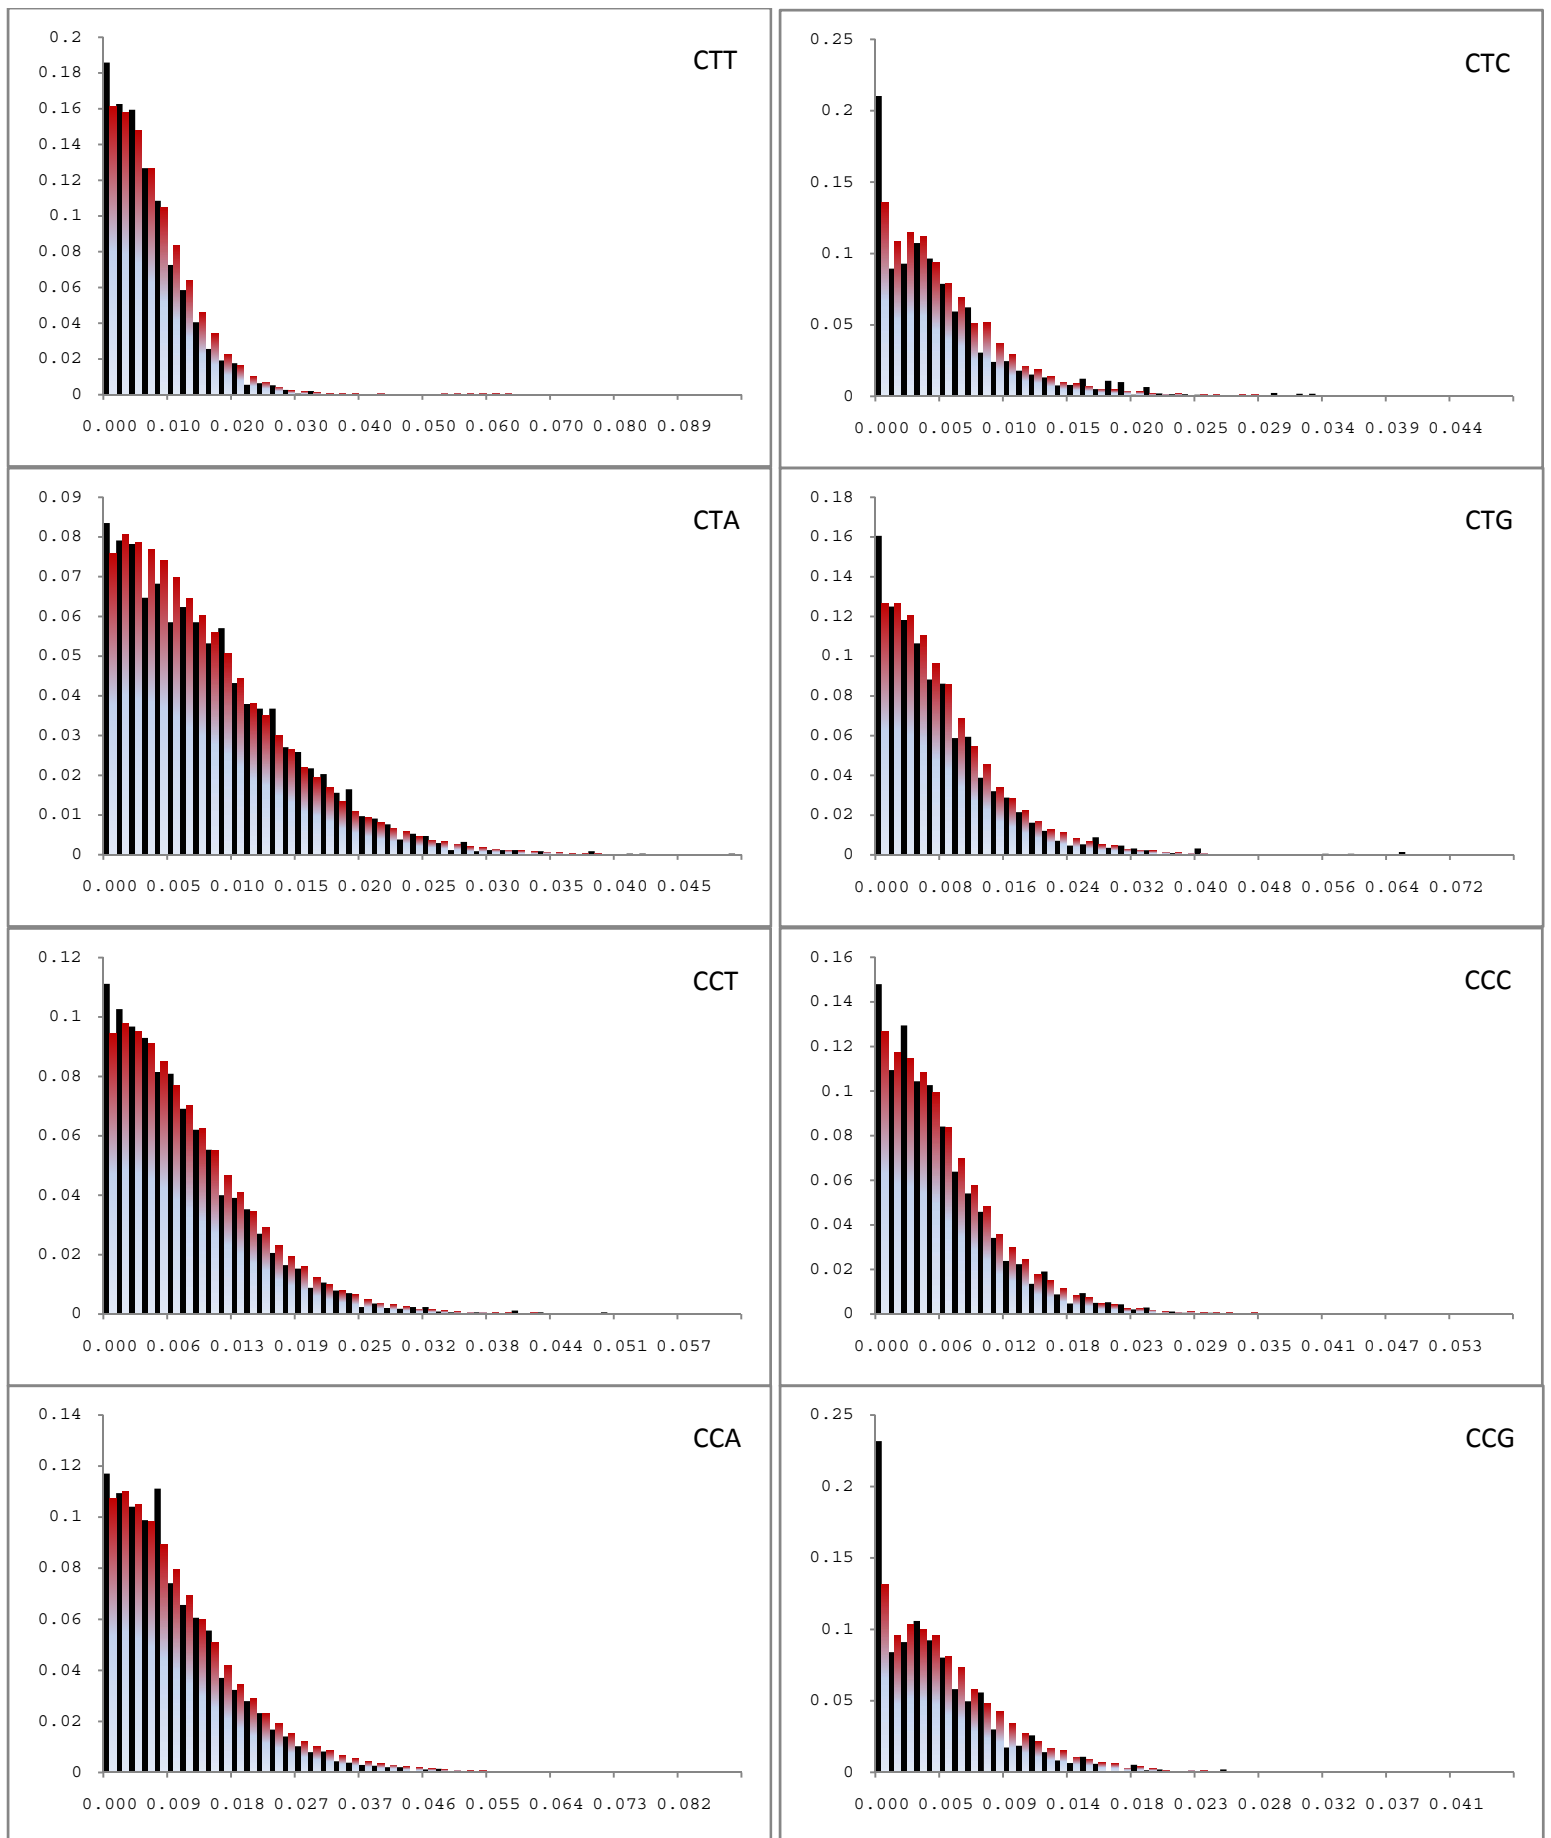

Figure S1 Continued

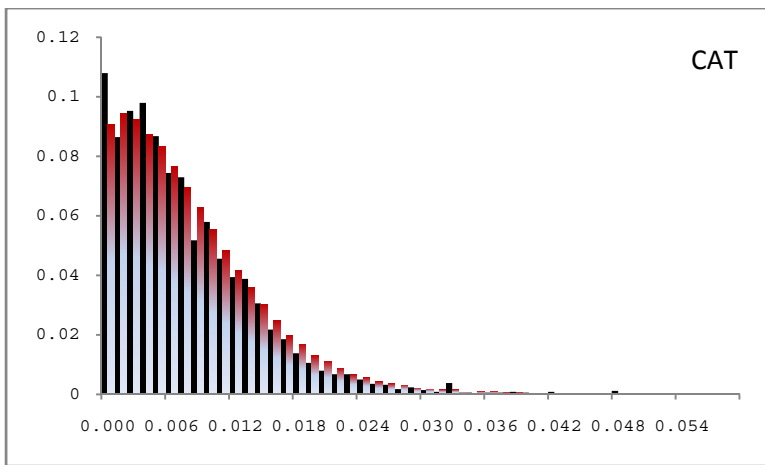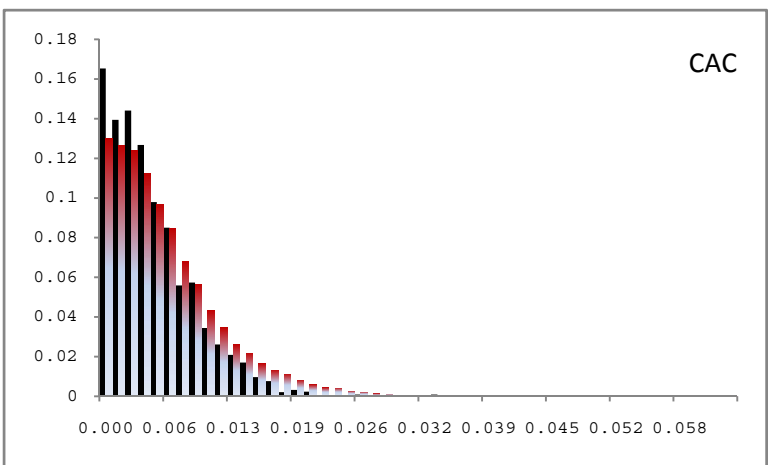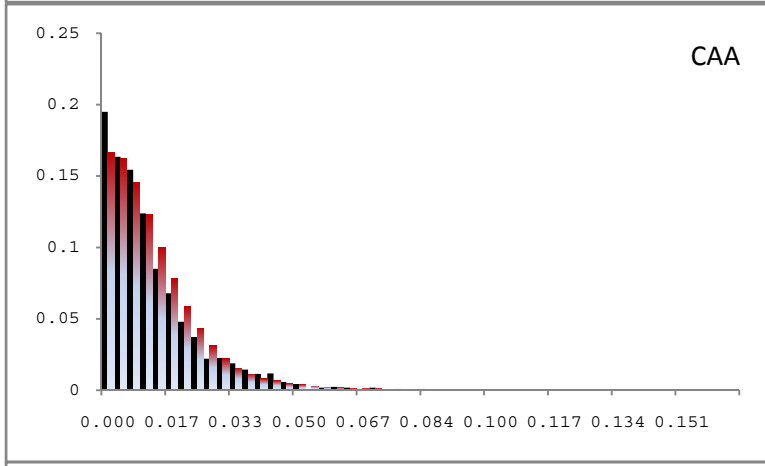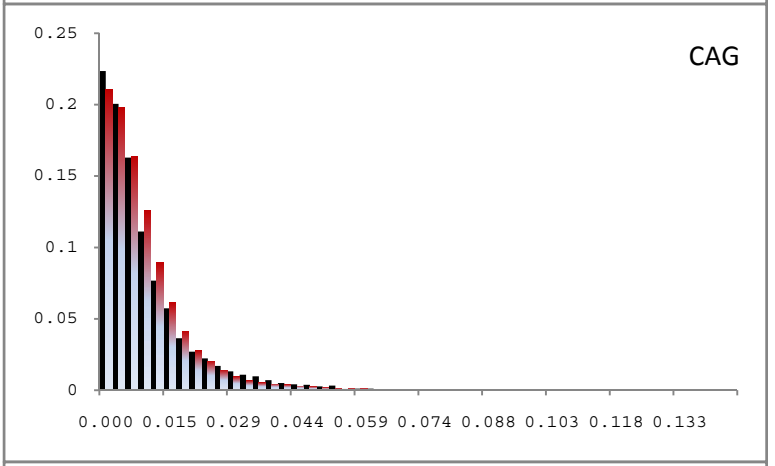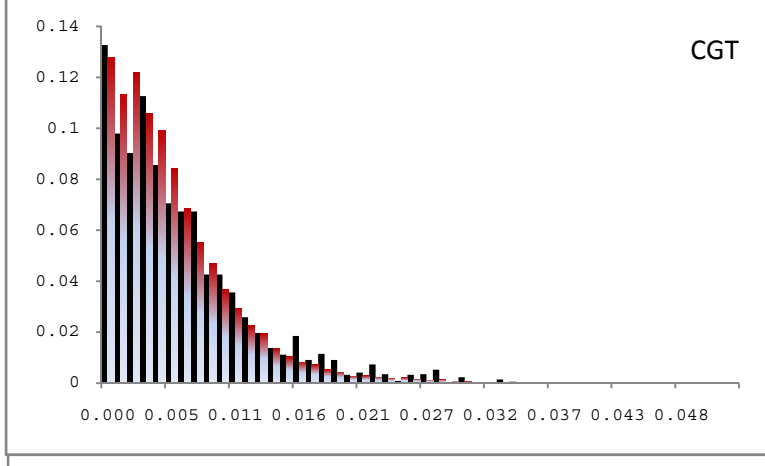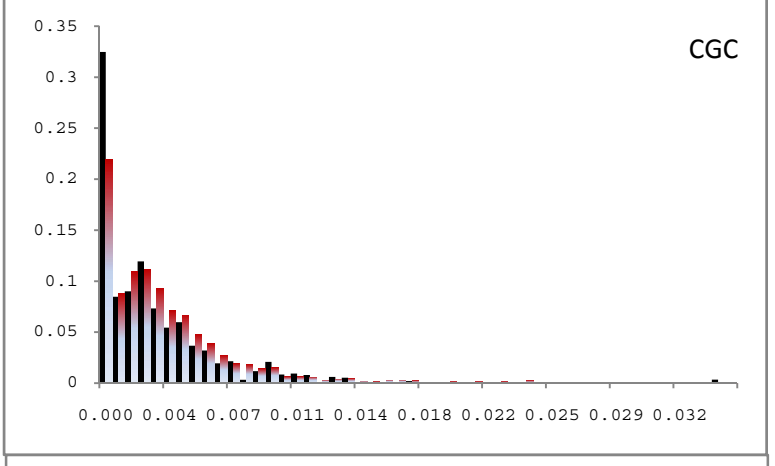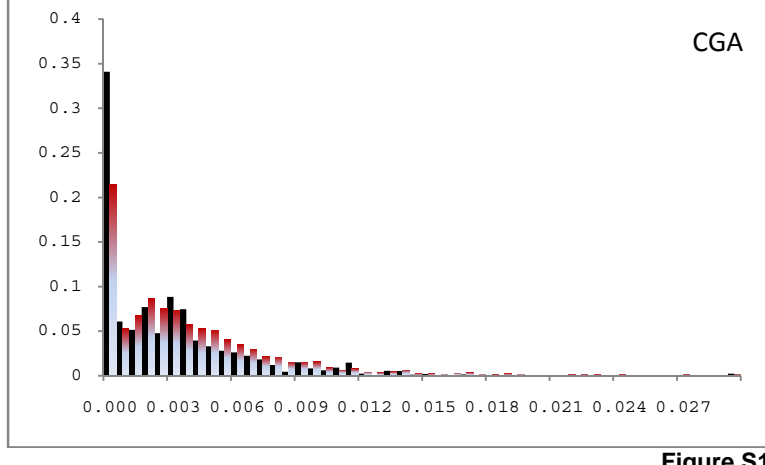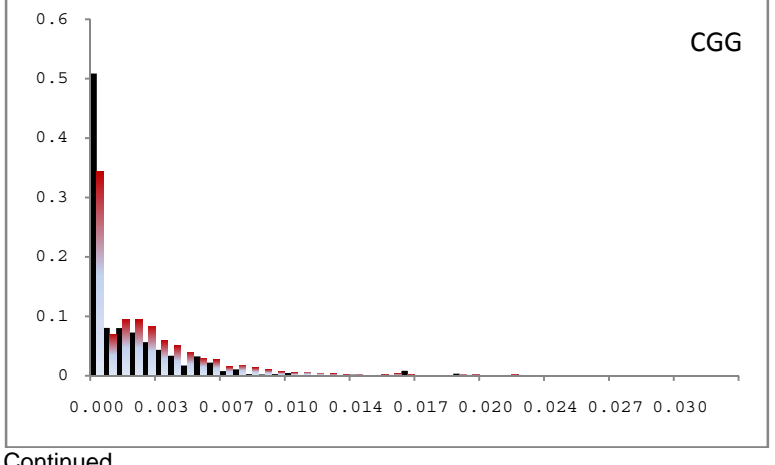

Figure S1 Continued

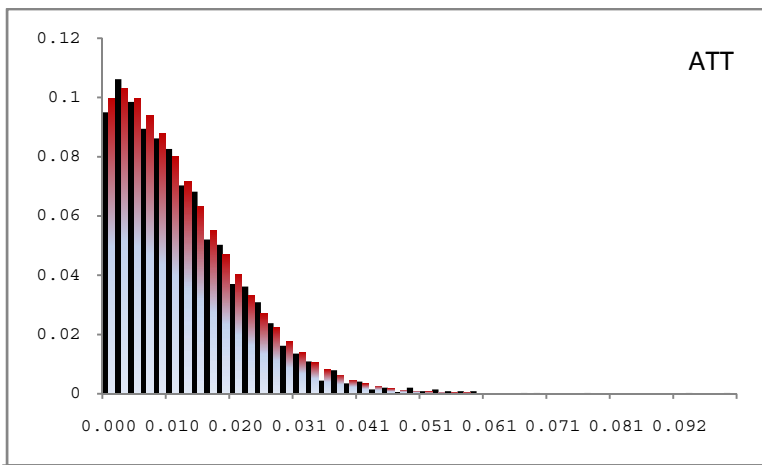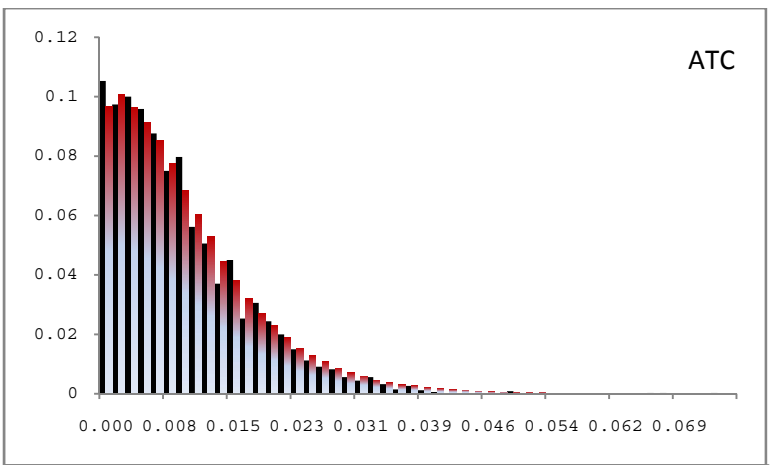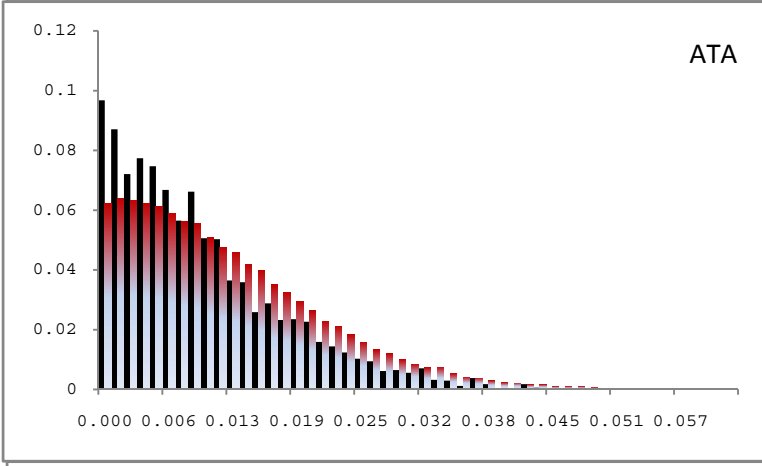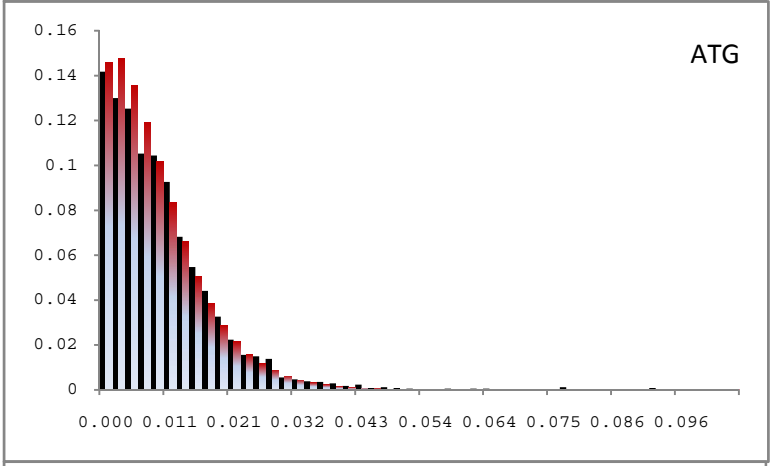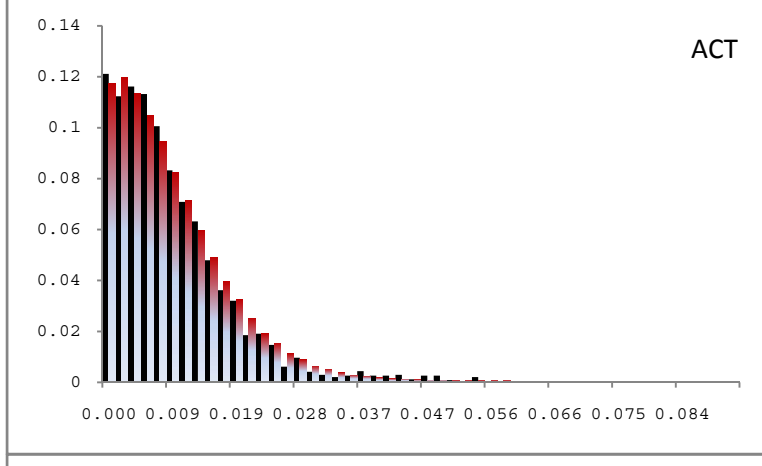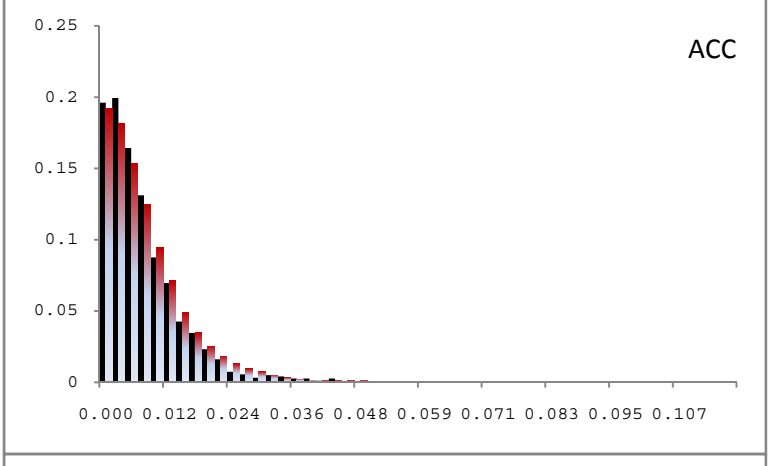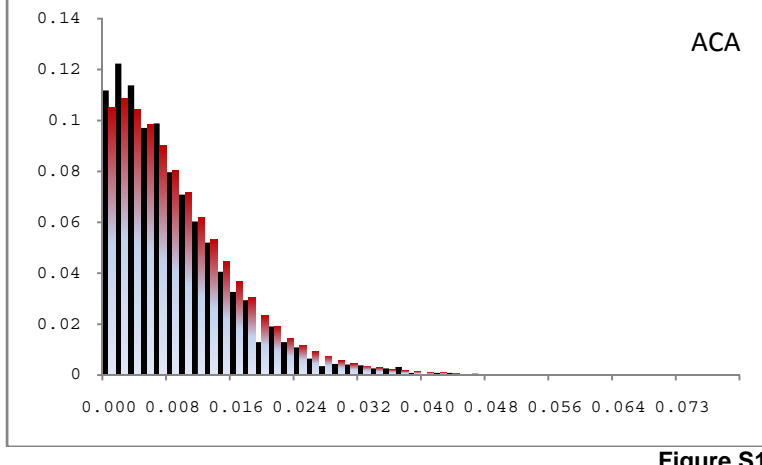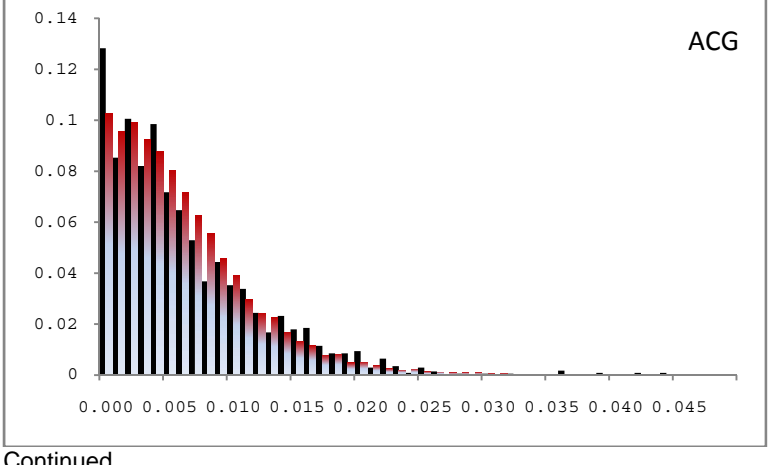

Figure S1 Continued

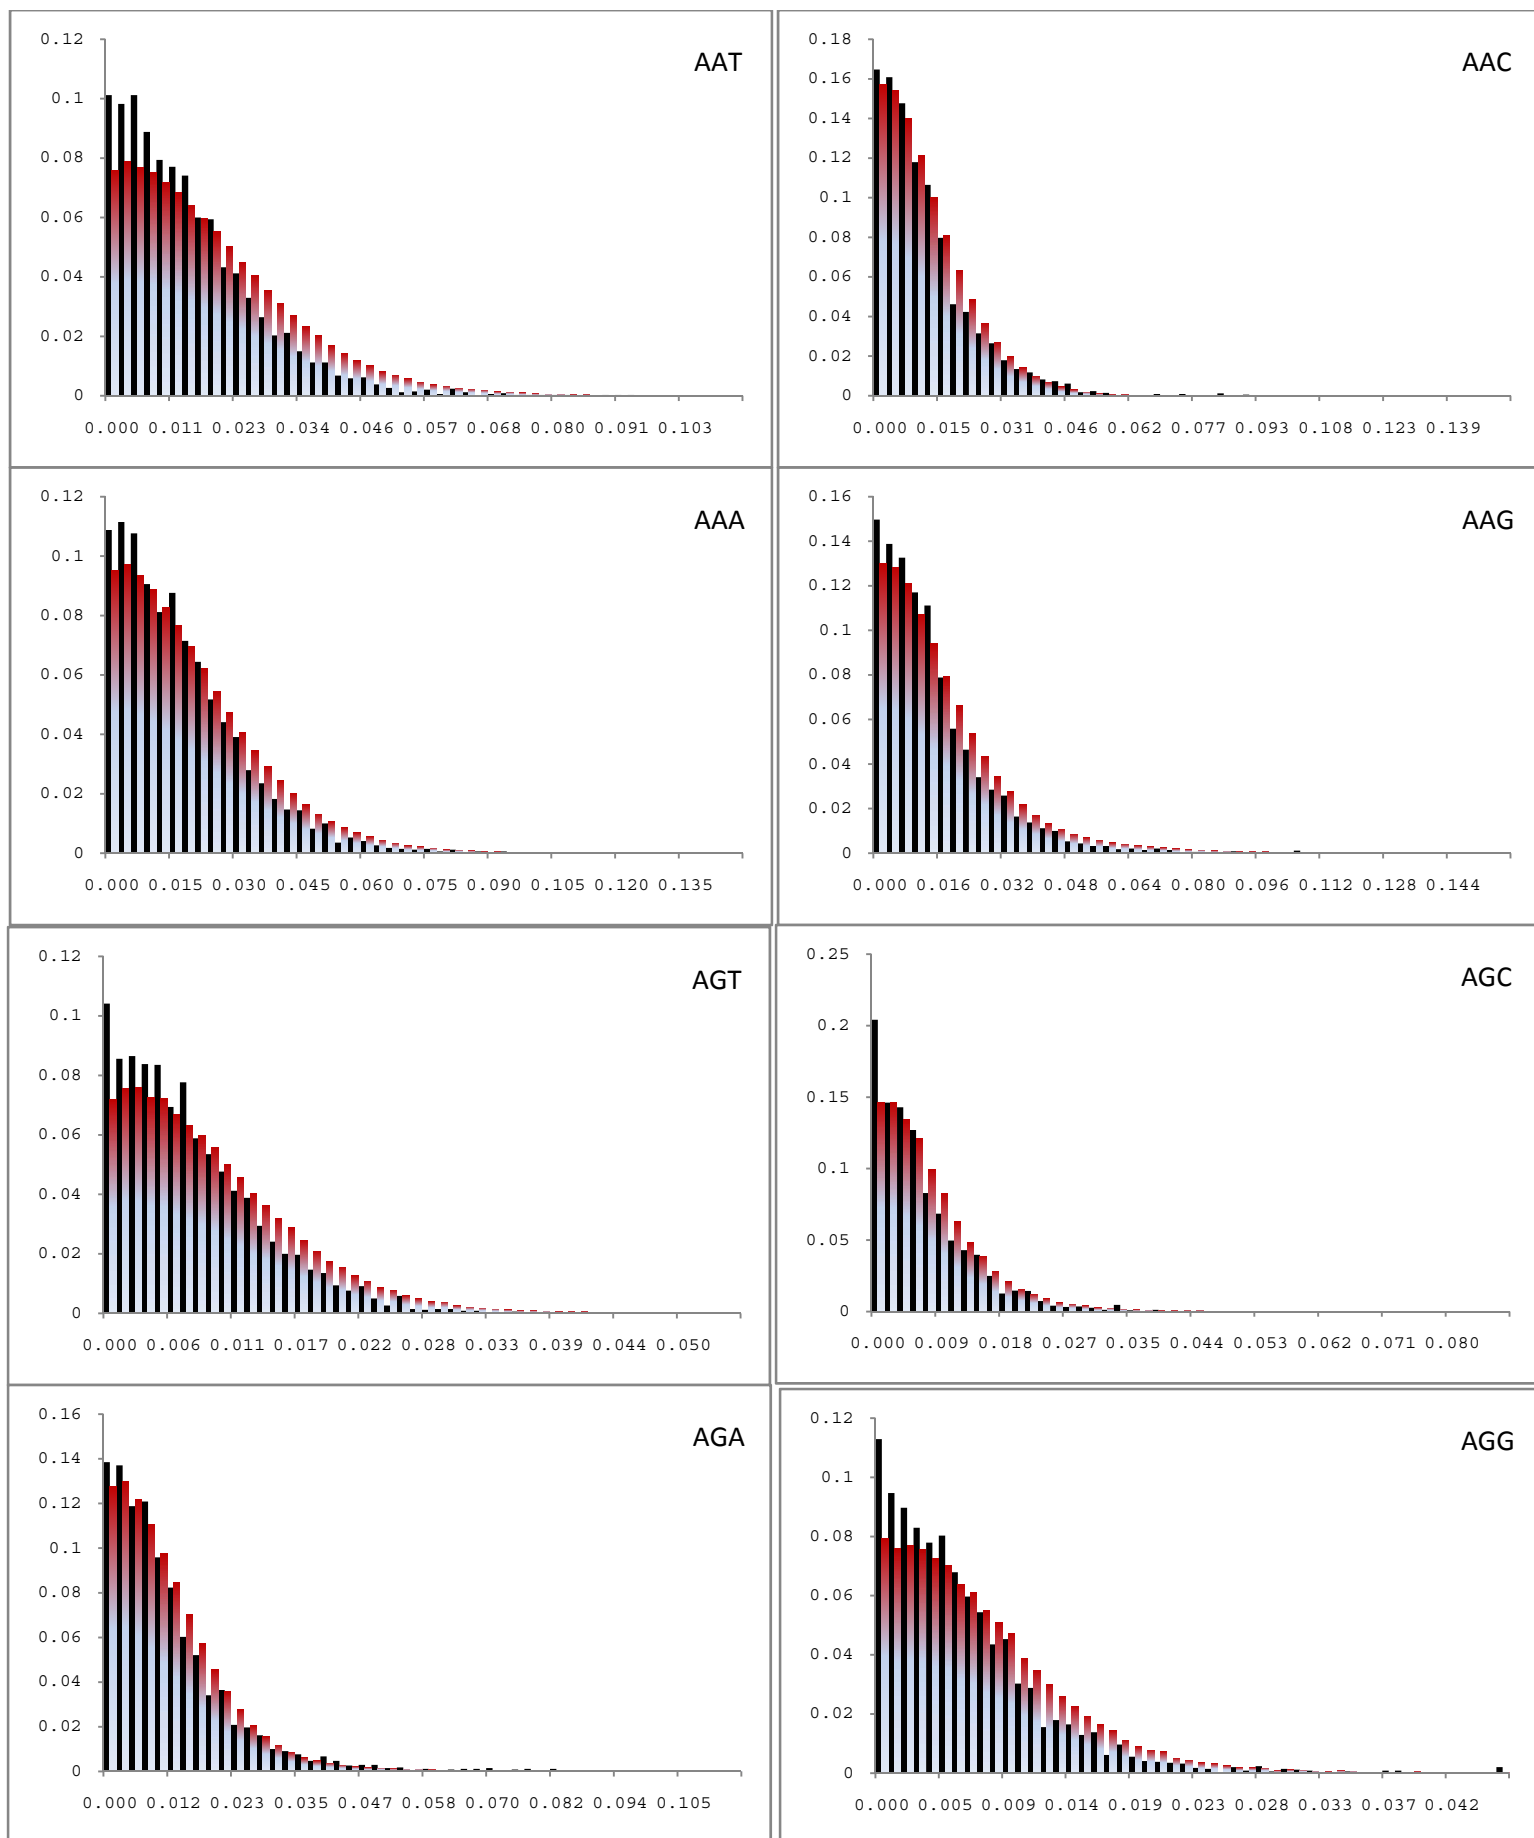

Figure S1 Continued

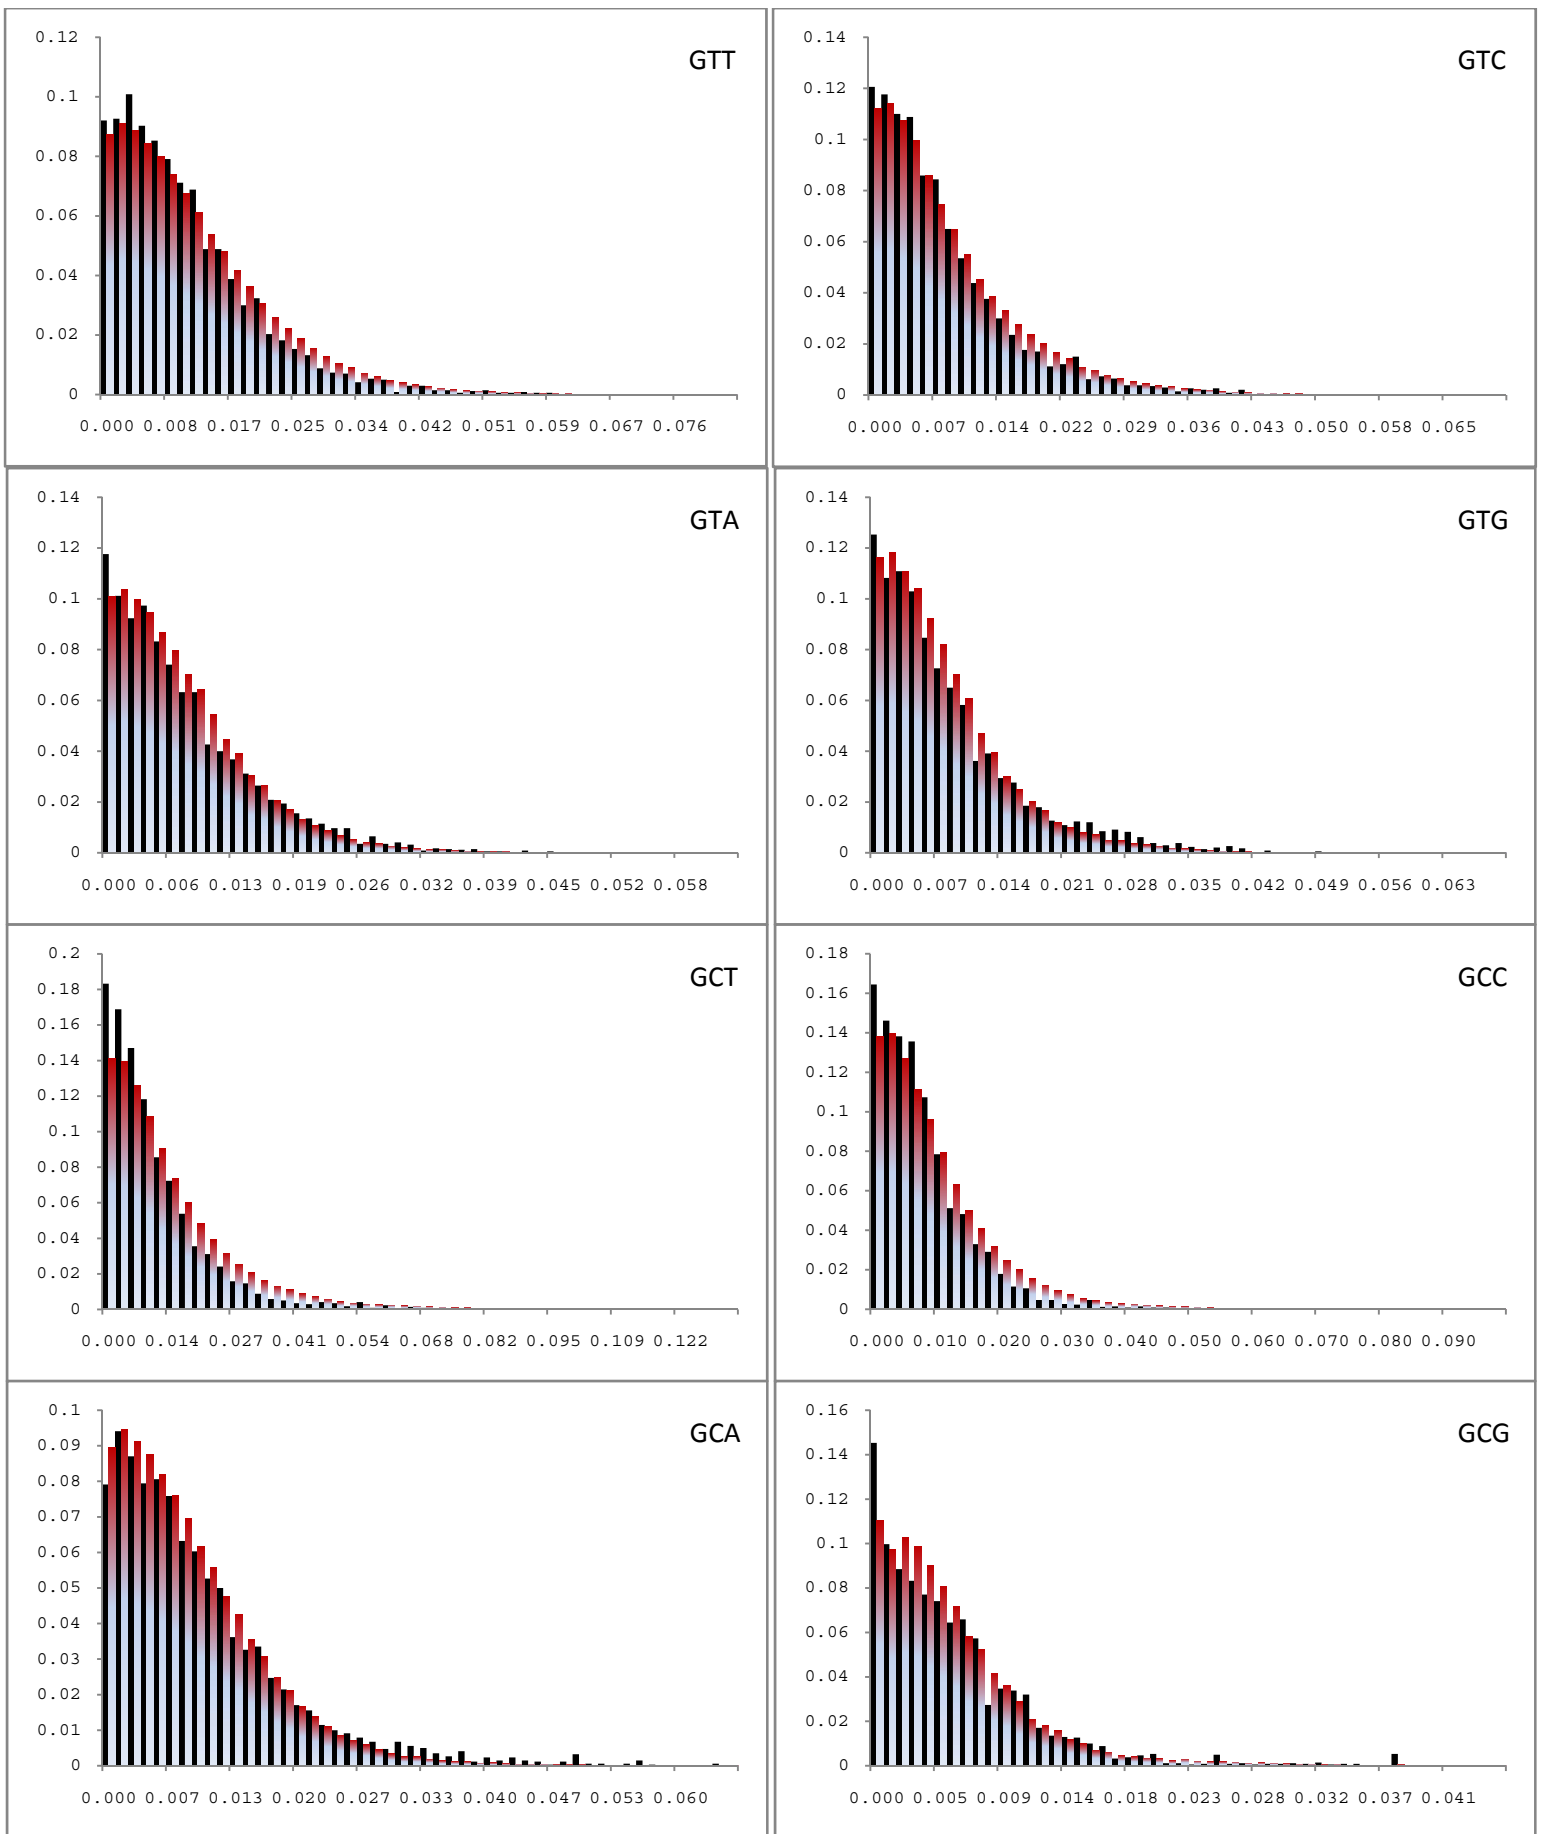

Figure S1 Continued

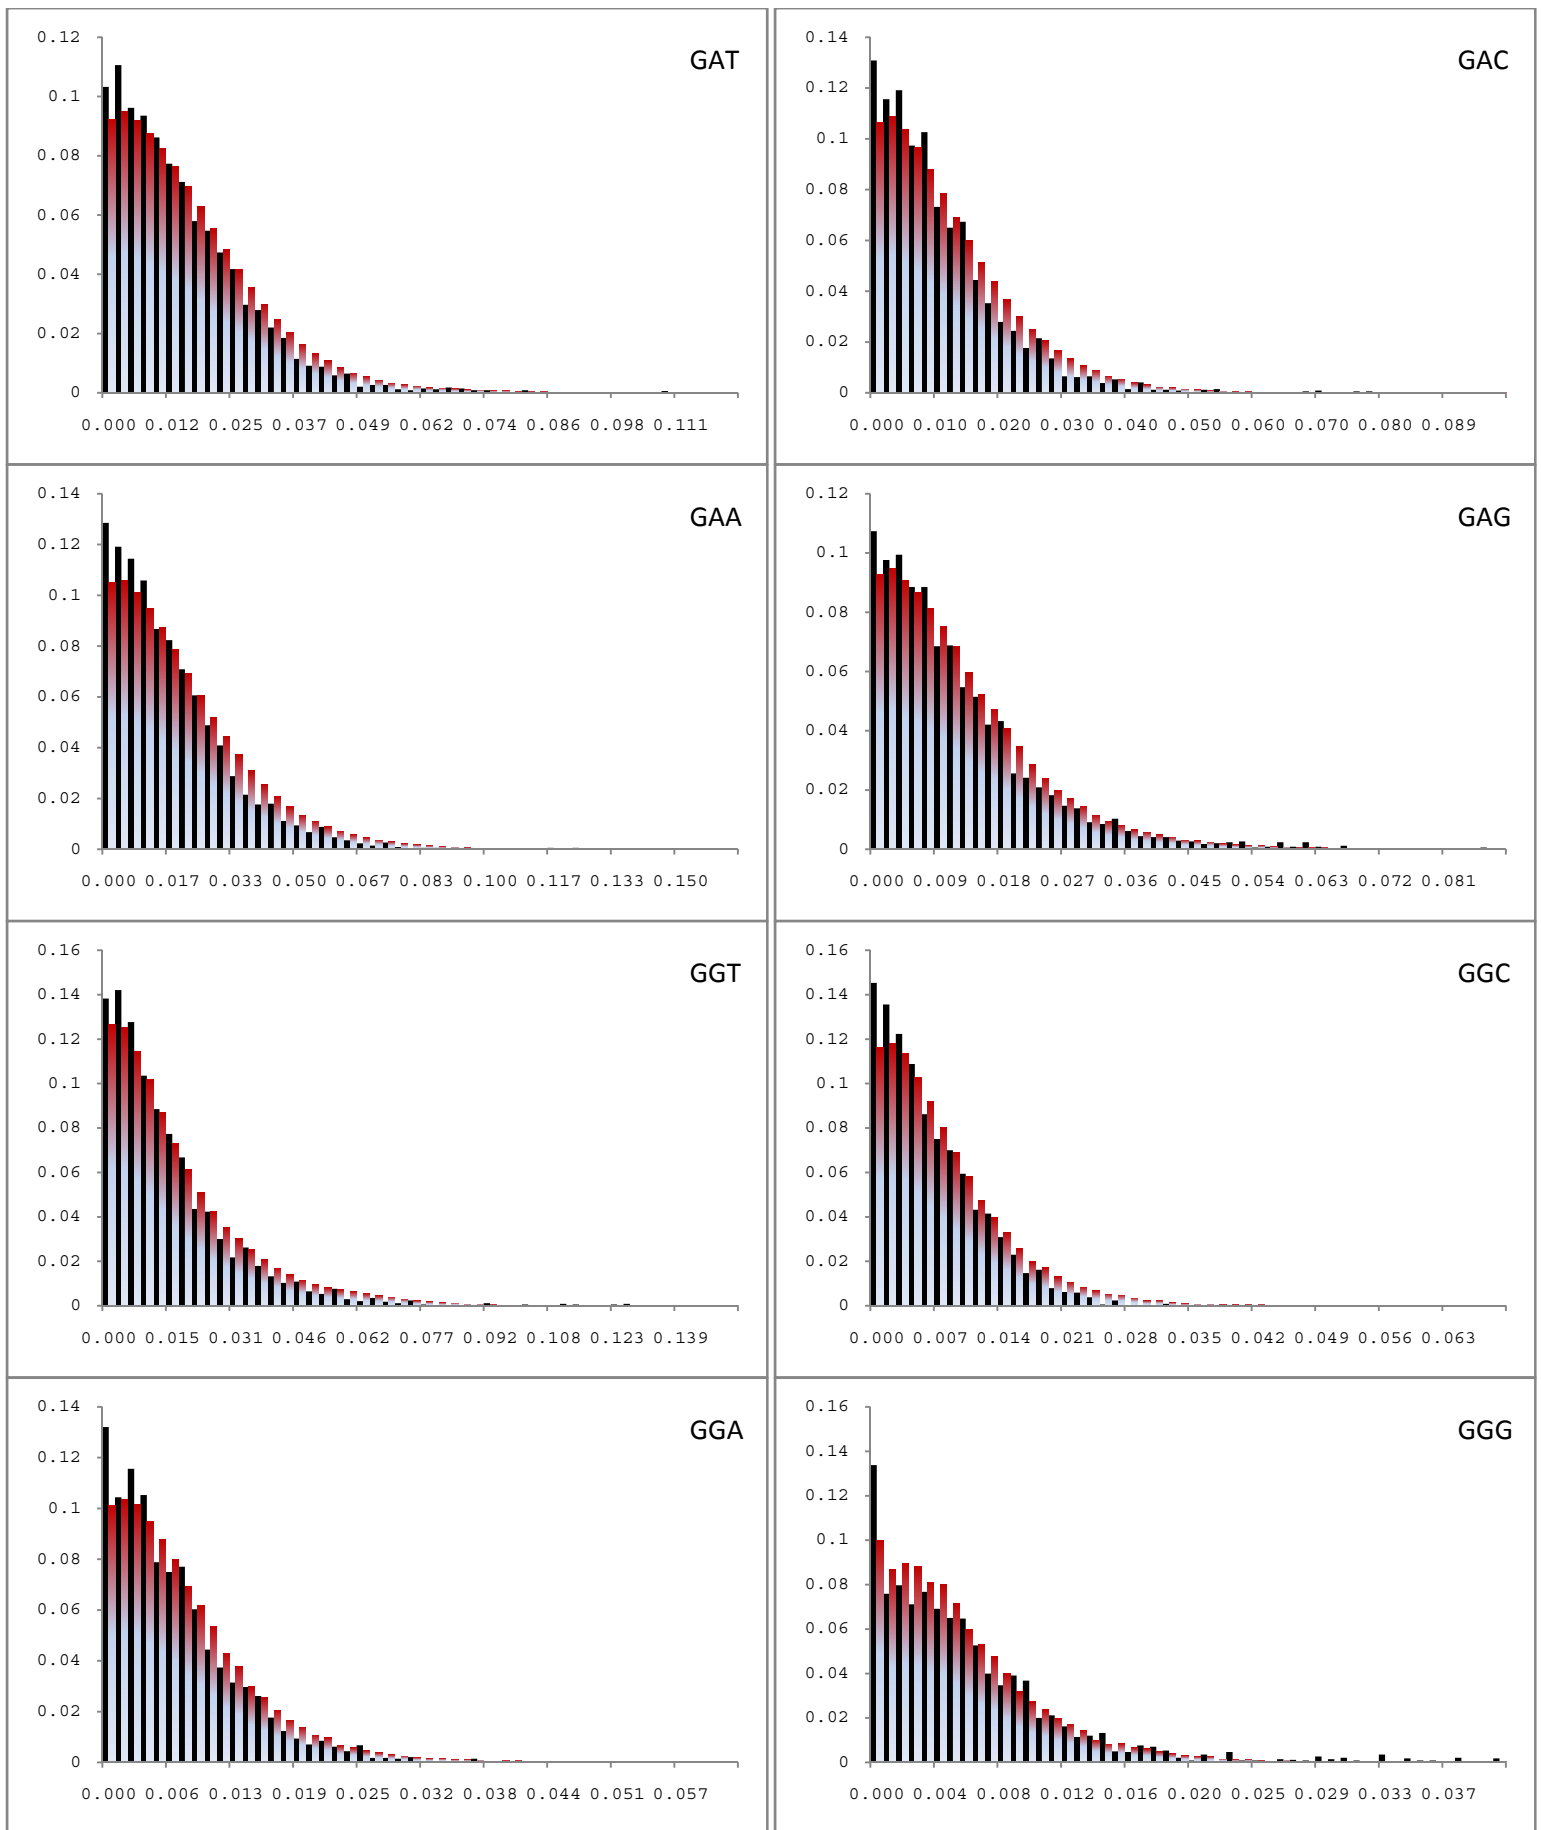

Figure S1 Continued
