# Supplementary material for: Sequence-based prediction of protein-protein interactions by means of codon usage
Source: Springer Nature journal article supplement (doi:10.1186/gb-2008-9-5-r87), 2008-05-23
Supplement: Additional file 11 [file gb-2008-9-5-r87-s11.pdf]

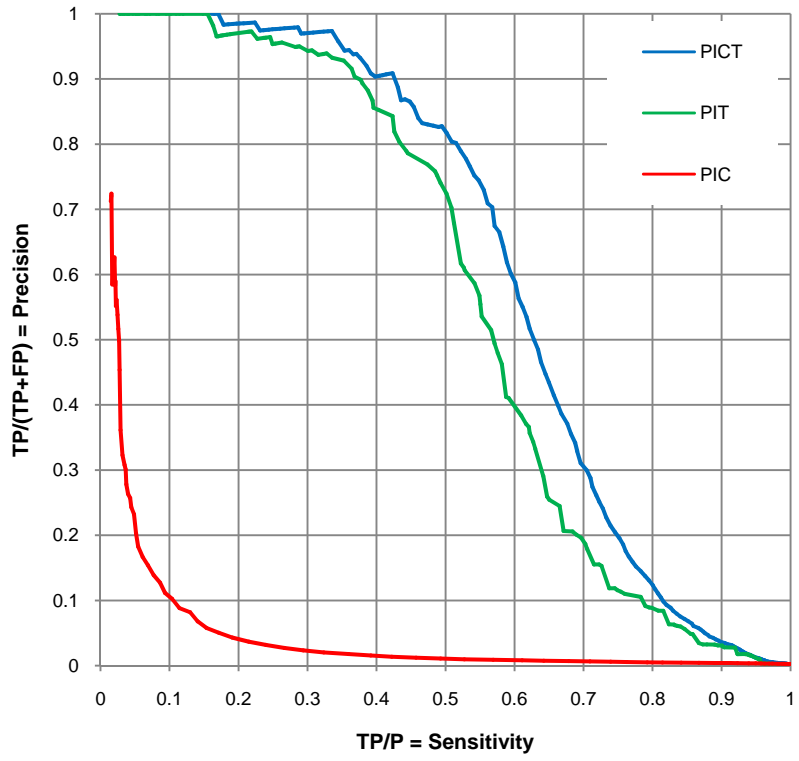

**Figure S11** Comparison of precision-recall curves in yeast for PIC (red), PIT (green) and PICT (blue). At 50% precision, PICT is 12.5% more sensitive than PIT alone.
