# Supplementary material for: Sequence-based prediction of protein-protein interactions by means of codon usage
Source: PubMed Central journal article supplement (PMC2441473; doi:10.1186/gb-2008-9-5-r87), 2008-05-23
Supplement: gb-2008-9-5-r87-S3.pdf [file gb-2008-9-5-r87-S3.pdf]

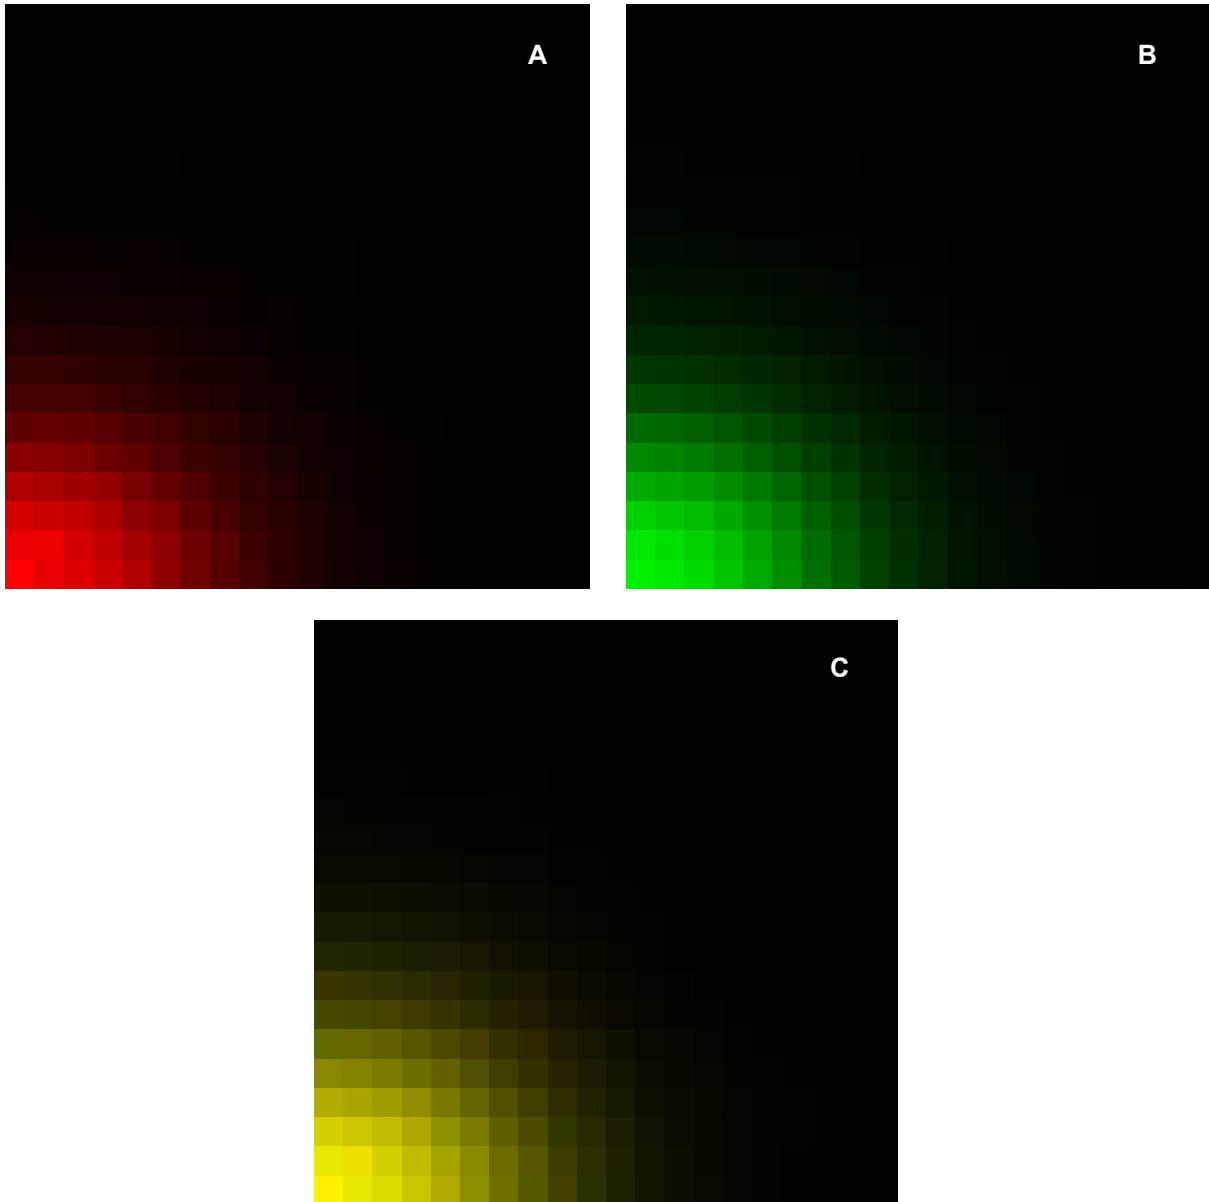

**Figure S3** Comparison of naïve Bayesian network and fully connected Bayesian network in yeast gold standard negative set. In each panel, the horizontal axis shows  $d(TTT)$  and the vertical axis shows  $d(TTC)$ . Color intensity represents the probability of a non-interacting pair of proteins having the respective  $d(TTT)$  and  $d(TTC)$  values, predicted by either fully connected Bayesian network (shown in red, panel **A**) or naïve Bayesian network (shown in green, panel **B**). Panel **C** shows the combination of panels **A** and **B** (yellow). The Naïve Bayesian network results in approximately the same distribution as the fully connected Bayesian network. The results are the same for almost all pairs of codons.
