# Supplementary material for: Sequence-based prediction of protein-protein interactions by means of codon usage
Source: PubMed Central journal article supplement (PMC2441473; doi:10.1186/gb-2008-9-5-r87), 2008-05-23
Supplement: gb-2008-9-5-r87-S6.pdf [file gb-2008-9-5-r87-S6.pdf]

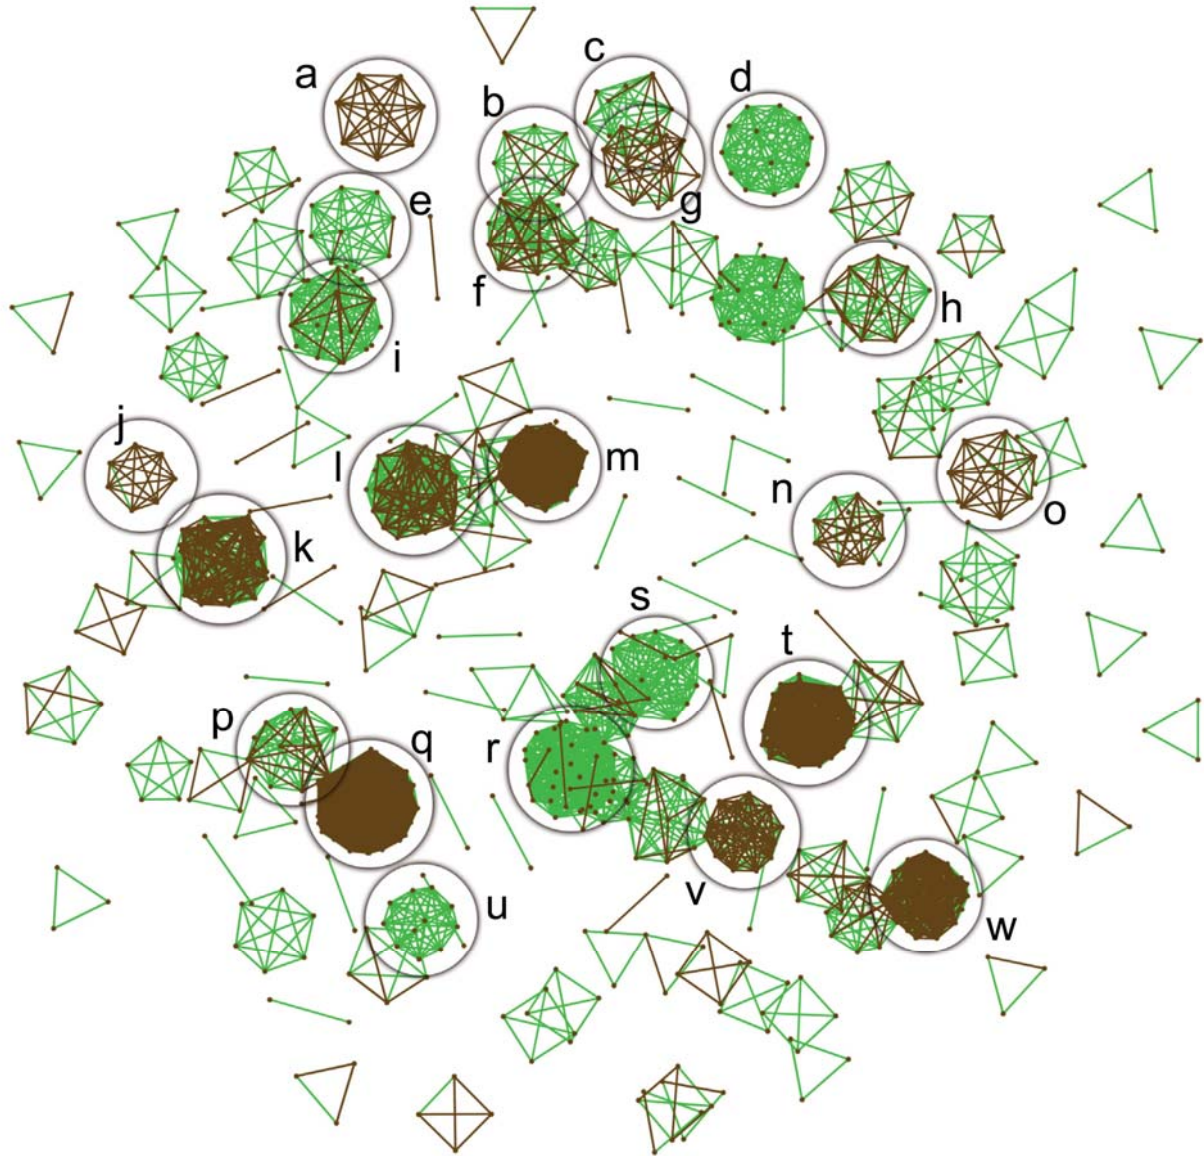

**Figure S6.** Comparison of PIPxPIC and yeast gold standard positive set (including ribosomal proteins). PIPxPIC (brown) covers 43% of the gold standard positives (green), while PIP has a coverage of 27% at the same specificity. (a) nucleosome; (b) COPI; (c) RNase MRP; (d) CCR4-NOT; (e) ER oligosaccharyl-transferase; (f) V-ATPase; (g) Cct-ring; (h) TFIIH; (i) small subunit of mitochondrial ribosome; (j) exocyst complex; (k) transcription; (l) pre-replication; (m) 40S ribosomal subunit; (n) ubiquinol cytochrome-c reductase; (o) cytochrome-c oxidase; (p) APC/C; (q) 60S ribosomal subunit; (r) RNA-polymerase II mediator; (s) SAGA complex; (t) proteasome; (u) TRAPP; (v) F1F0 ATP synthase; (w) large subunit of mitochondrial ribosome.
